# Supplementary material for: The Phosphatidylserine Receptor TIM-1 Enhances Authentic Chikungunya Virus Cell Entry
Source: MDPI journal article supplement (doi:10.3390/cells10071828), 2021-07-20
Supplement: s1 [file s1]

# Supplementary material

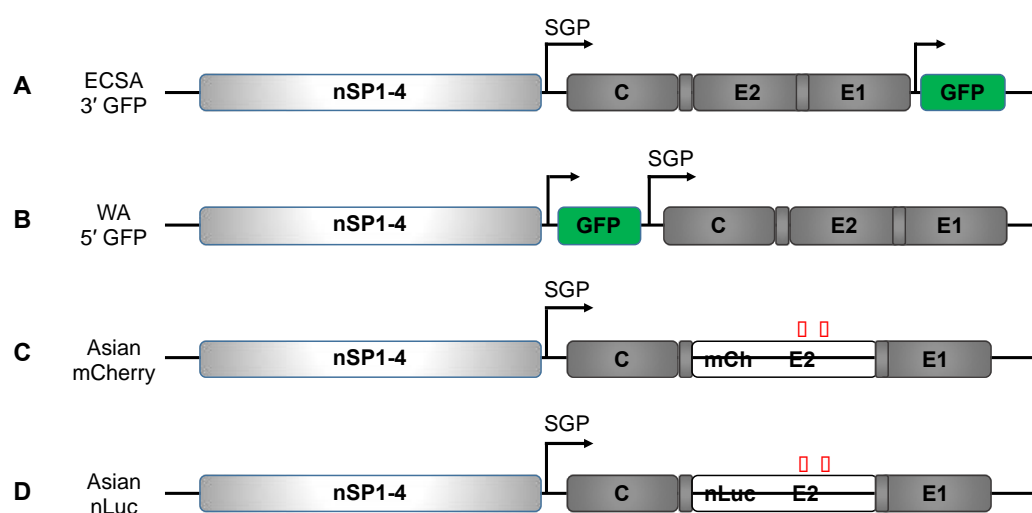

**Figure S1.** Schematic representation of CHIKV strains. **(A)** East Central South African (ECSA) strain encoding a green fluorescent protein (GFP) gene on the 3' end of the genome (3'GFP CHIKV). **(B)** West African (WA) strain encoding a green fluorescent protein (GFP) gene 5' end of the structural genes (5'GFP CHIKV). **(C)** Asian vaccine strain (181/25) encoding mCherry-fluorescent protein gene fused to the E2 gene hence the viral particles are fluorescent (mCherry-CHIKV). **(D)** Asian vaccine strain (181/25) encoding nano-luciferase gene fused to the E2 gene (nLuc-CHIKV). The Asian strain is attenuated due to amino acid substitutions at positions 12 and 82 in the E2 envelope glycoprotein (red asterisk).

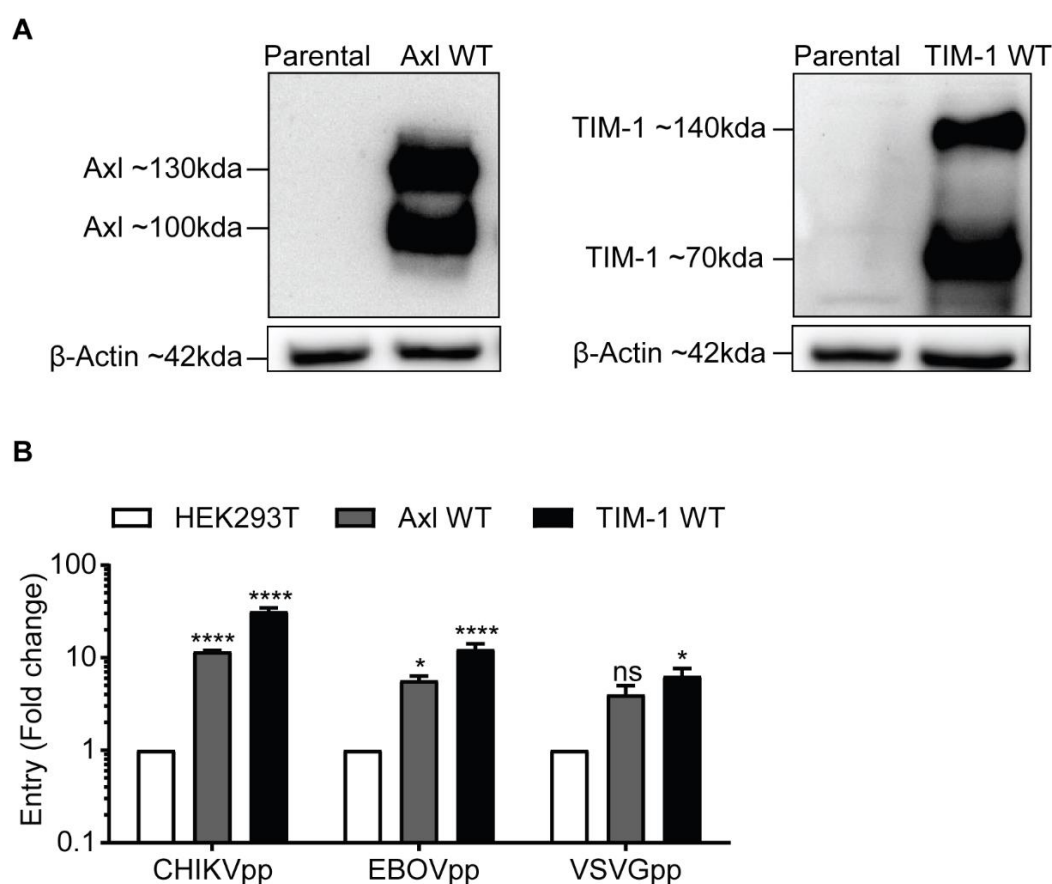

**Figure S2:** Expression of Axl and TIM-1 in HEK293T cells enhances entry of CHIKV glycoprotein-based pseudovirus. **(A)** Western blot of parental HEK293T cells and cells transduced to express Axl and TIM-1. Cells were selected for resistance to blasticidin and proteins in the cell lysate separated by SDS-PAGE. TIM-1 and Axl expression was probed with monoclonal antibodies. **(B)** Transduction of cells with lentiviral pseudoparticles encoding glycoproteins of CHIKV, EBOV and VSV to determine entry efficiency in parental HEK293T, Axl and TIM-1 expressing cells after 24h. VSVG pseudoparticles (VSVGpp) prediluted 1:100. Entry levels were assessed by luciferase assay. The error bars represent mean  $\pm$  SEM of three independent experiments. Statistical significance was calculated using a Dunnett's multiple comparisons test (2way ANOVA) \* $p < 0.05$ , \*\* $p < 0.01$ , \*\*\* $p < 0.001$  and \*\*\*\* $p < 0.0001$ .

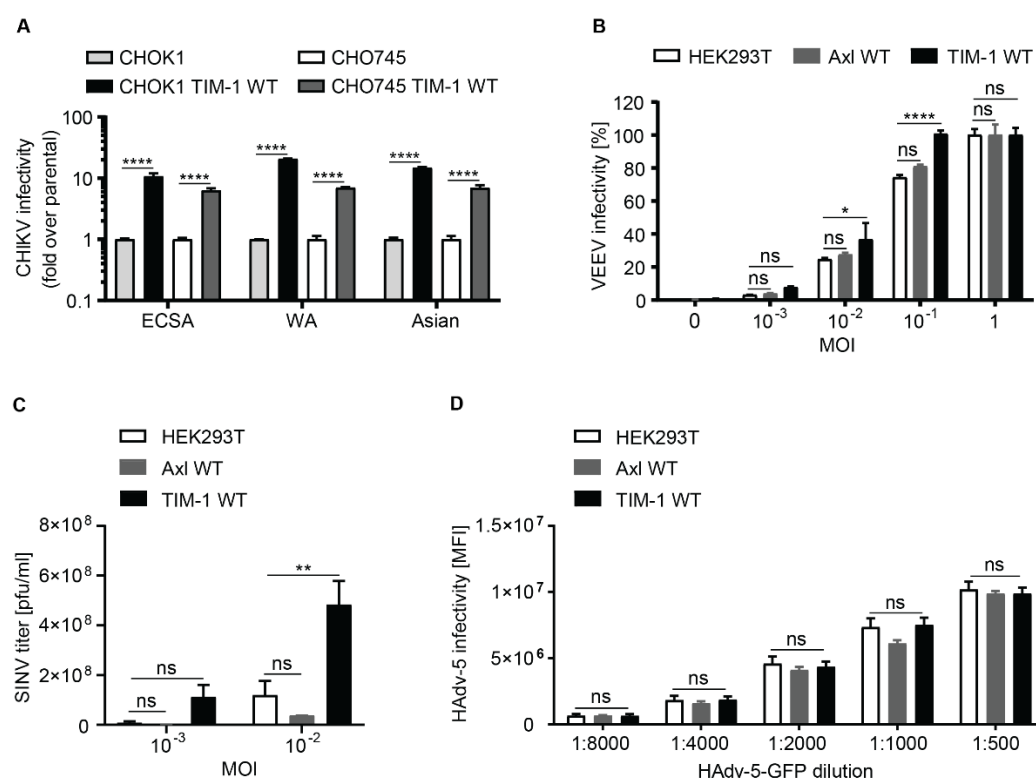

**Figure S3:** TIM-1-dependent infectivity of CHIKV genotypes and other *Alphavirus* species. **(A)** Parental and TIM-1 WT expressing CHO cells were inoculated with ECSA 3'GFP-CHIKV (MOI 0.01), 5'GFP-CHIKV WA (MOI 0.01) and Asian mc-CHIKV (MOI 0.1). At 24 hpi, infectivity was determined by flow cytometry. **(B)** Parental HEK293T, Axl WT and TIM-1 WT expressing cells were challenged with VEEV-GFP at indicated MOI. Percentage of infected cells were assessed by flow cytometry. **(C)** Parental HEK293T, Axl WT and TIM-1 WT expressing cells were challenged with SINV at indicated MOI. After 24h the supernatants were collected and titer taken on Vero cells. **(D)** Parental HEK293T, Axl WT and TIM-1 WT expressing cells were challenged with GFP expressing HAdV-5 at indicated dilutions. After 24 h the infectivity was determined by GFP expression imaged with a Trophos plate reader. The error bars represent mean  $\pm$  SEM of three independent experiments. Statistical significance was calculated using a Dunnett's multiple comparisons test (2way ANOVA) \* $p < 0.05$ , \*\* $p < 0.01$ , \*\*\* $p < 0.001$  and \*\*\*\* $p < 0.0001$ .

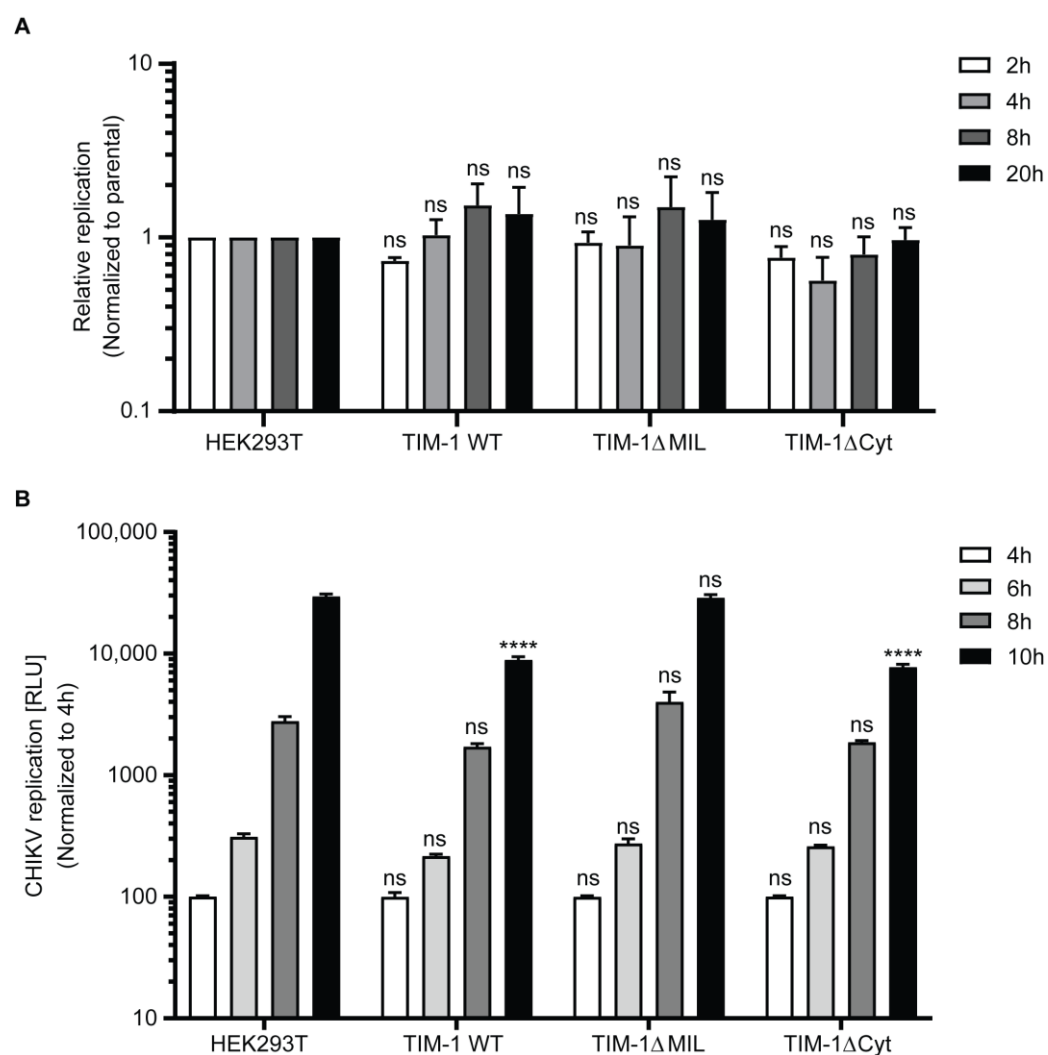

**Figure S4:** CHIKV replicates independently of TIM-1. **(A)** Parental HEK293T cells expressing TIM-1 WT, TIM-1ΔMIL and TIM-1ΔCyt were electroporated with CHIKV subgenomic RNA encoding luciferase gene. After 24 h, replication was determined using luciferase assay. **(B)** Parental HEK293T cells expressing TIM-1 WT, TIM-1ΔMIL and TIM-1ΔCyt were electroporated with authentic Asian CHIKV encoding nano-luciferase gene. After 10h, CHIKV replication was determined by luciferase assay. The error bars represent mean  $\pm$  SEM of three independent experiments. Statistical significance was calculated using a Dunnet's multiple comparisons test (2way ANOVA) \* $p < 0.05$ , \*\* $p < 0.01$ , \*\*\* $p < 0.001$  and \*\*\*\* $p < 0.0001$ .

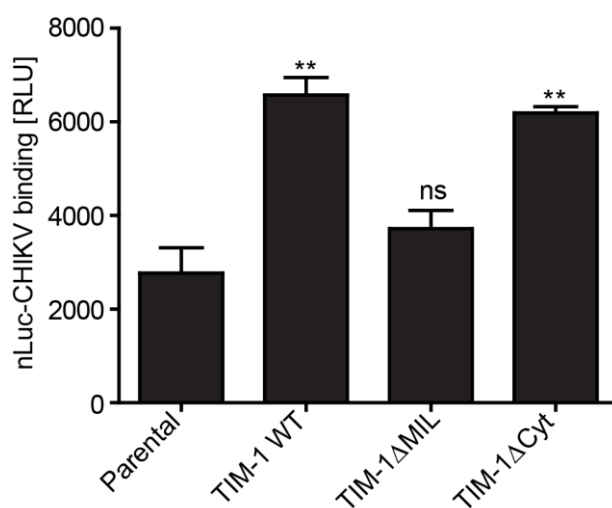

**Figure S5:** Relative binding of nLuc-CHIKV virus. Binding on the surface of parental and cells expressing TIM-1 WT, TIM-1 $\Delta$ MIL and TIM-1 $\Delta$ Cyt. Cells were inoculated with Asian CHIKV encoding nano-luciferase gene and incubated at 4°C for 1 hour and binding detected by luciferase assay.

| CHIKV Strain                | ECSA |      |      | WA   |      |      | Asian |      |      |
|-----------------------------|------|------|------|------|------|------|-------|------|------|
| CHOK1 (% positive)          | 0.6  | 0.7  | 0.7  | 0.7  | 0.8  | 0.8  | 1.3   | 1.5  | 1.5  |
| CHOK1-TIM1 WT (% positive)  | 6.2  | 6.6  | 8.9  | 16.0 | 15.4 | 15.4 | 19.7  | 22.0 | 22.0 |
| CHO745 (% positive)         | 1.6  | 1.7  | 1.9  | 1.7  | 2.7  | 2.7  | 2.6   | 3.9  | 3.9  |
| CHO745-TIM1 WT (% positive) | 9.4  | 11.2 | 12.3 | 15.6 | 16.8 | 16.8 | 19.4  | 26.8 | 26.8 |

  

| Hours post infection | HaCat (nLuc-CHIKV, RLU) |          |          | TIM-1 WT (nLuc-CHIKV, RLU) |         |         |
|----------------------|-------------------------|----------|----------|----------------------------|---------|---------|
| 0                    | 232                     | 126      | 184      | 269.5                      | 136.5   | 163.5   |
| 4                    | 1889157                 | 824547.5 | 768288   | 2635096                    | 1045724 | 1093571 |
| 8                    | 915185.5                | 718722.5 | 704849   | 1014474                    | 712713  | 716341  |
| 12                   | 1076710                 | 425443   | 454877.5 | 1324928                    | 933565  | 982788  |
| 24                   | 516416.5                | 409974   | 456643   | 8131405                    | 4972497 | 6395615 |
| 48                   | 159200.8                | 147524.5 | 170825   | 3088506                    | 3481855 | 3875003 |

  

| Hours post infection | TIM-1 $\Delta$ MIL (nLuc-CHIKV, RLU) |          |          | TIM-1 $\Delta$ Cyt (nLuc-CHIKV, RLU) |          |          |
|----------------------|--------------------------------------|----------|----------|--------------------------------------|----------|----------|
| 0                    | 297                                  | 116      | 129.5    | 238.5                                | 112.5    | 116      |
| 4                    | 2377758                              | 638731   | 711947   | 2348411                              | 558820   | 667805.5 |
| 8                    | 1120652                              | 731908.5 | 631266   | 1042929                              | 635041   | 678559   |
| 12                   | 850393.5                             | 625406.5 | 639253.5 | 691587.5                             | 481390.5 | 516043.5 |
| 24                   | 710820.5                             | 438678.5 | 469116.5 | 829659                               | 610625.5 | 625040   |
| 48                   | 231507.5                             | 222521   | 240294   | 461672.5                             | 487958.8 | 514165   |

  

| Hours post infection | Axl WT (nLuc-CHIKV, RLU) |          |          |
|----------------------|--------------------------|----------|----------|
| 0                    | 228.5                    | 102.5    | 109      |
| 4                    | 1791784                  | 458437   | 562135.5 |
| 8                    | 963848.5                 | 507544   | 576314.5 |
| 12                   | 977991                   | 469230.5 | 514147   |
| 24                   | 800115.5                 | 513822.5 | 527232.5 |
| 48                   | 348055.8                 | 263154   | 432935.5 |

**Table S1:** Baseline values after infection with authentic CHIKV. ECSA 3'GFP-CHIKV, 5'GFP-CHIKV WA and Asian mc-CHIKV used to infect CHO cells and percentage of infected cells are indicated. HaCat cells were infected with Asian CHIKV encoding nano-luciferase gene (nLuc-CHIKV) and relative light units indicate the infection levels.

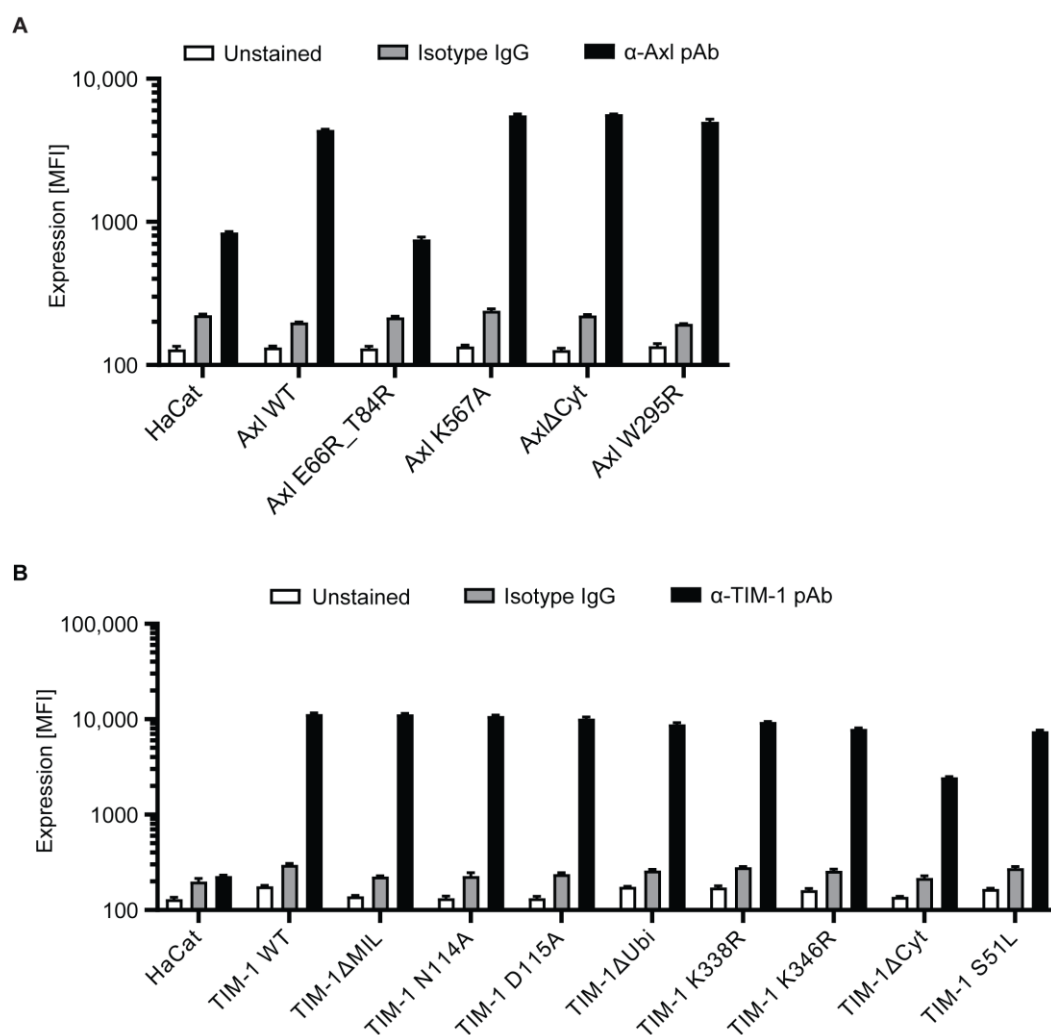

**Figure S6.** Expression of Axl and TIM-1 in HaCat cells. **(A)** Cell surface expression of Axl WT and Axl variants by HaCat cells analyzed by antibody staining and flow cytometry. **(B)** Cell surface expression of TIM-1 WT and TIM-1 variants by HaCat cells analyzed by antibody staining and flow cytometry. The error bars represent mean  $\pm$  SEM of at least three representative replicates.

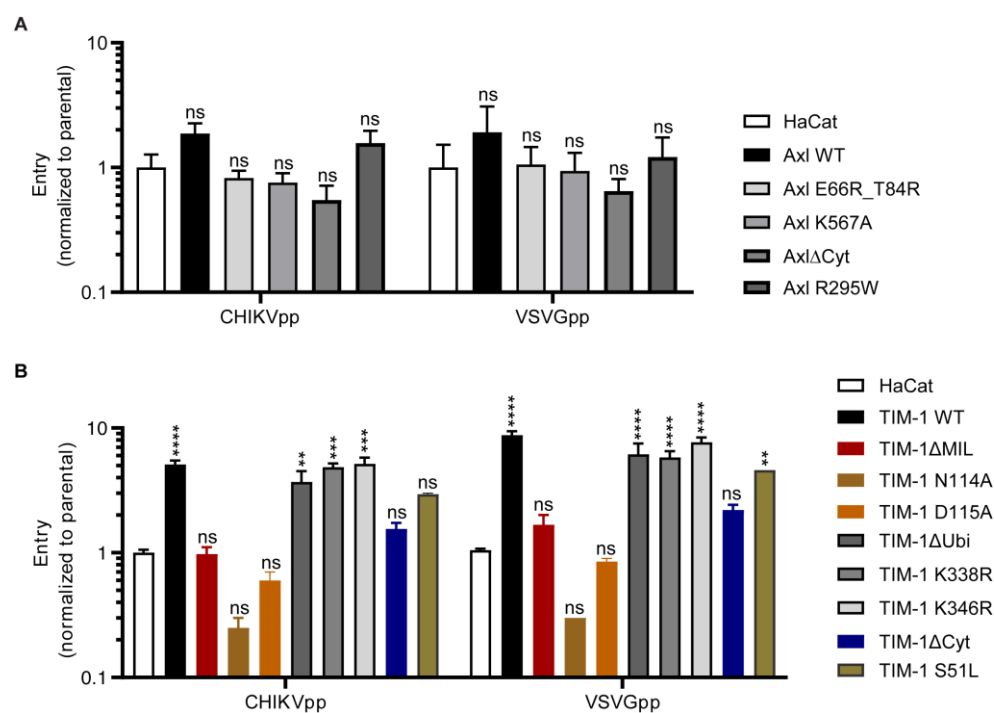

**Figure S7.** TIM-1 enhances CHIKV and VSV pseudoparticle entry in HaCat cells. Parental HaCat - immortalized keratinocytes and HaCat cells expressing; **(A)** Axl WT and variants **(B)** TIM-1 WT and variants were transduced with luciferase encoding lentiviral pseudoparticles-bearing glycoproteins of CHIKV or VSV. Entry was determined by luciferase assay and normalized to parental HaCat cells. The error bars represent mean  $\pm$  SEM of at least three independent experiments. Statistical significance was calculated using a Dunnett's multiple comparisons test (2way ANOVA) \* $p < 0.05$ , \*\* $p < 0.01$ , \*\*\* $p < 0.001$  and \*\*\*\* $p < 0.0001$ .

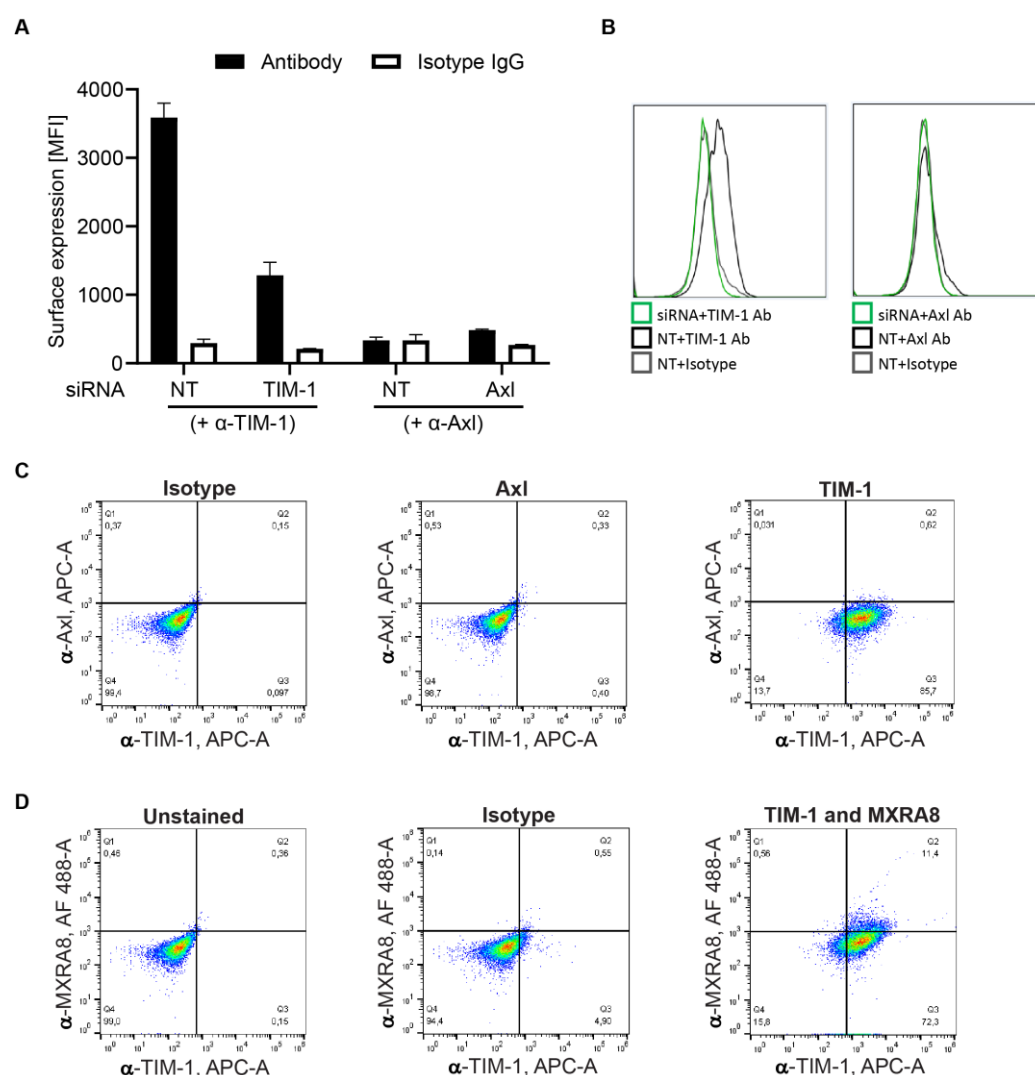

**Figure S8:** Surface expression of TIM-1, Axl and MXRA8 in Huh7.5 cells. **(A)** Graph showing expression level of TIM-1 and Axl in cells treated with either targeting or non-targeting (NT) siRNA. After 48 h the cells were stained with monoclonal antibodies for surface expression of TIM-1/Axl. **(B)** Histogram depicting the distribution of cells expressing TIM-1 or Axl. **(C)** Dot plot showing antibody control, Axl and TIM-1 staining **(D)** Dot plot showing unstained, antibody control, TIM-1 and MXRA8 staining of Huh7.5 cells expressing TIM-1 and/or MXRA8.

|        |                    | nLuc-CHIKV (RLU) |       |       |      |      |      |
|--------|--------------------|------------------|-------|-------|------|------|------|
| 0 min  | HEK293T            | 1521             | 2491  | 2867  | 2819 | 2812 | 2948 |
|        | TIM-1 WT           | 3884             | 4144  | 4301  | 4506 | 4527 | 4397 |
|        | TIM-1 $\Delta$ MIL | 2279             | 1992  | 2184  | 2737 | 2744 | 2648 |
|        | TIM-1 $\Delta$ Cyt | 2737             | 2709  | 2839  | 4404 | 4520 | 4575 |
| 10 min | HEK293T            | 1508             | 1590  | 1583  | 3939 | 3912 | 4001 |
|        | TIM-1 WT           | 12596            | 12789 | 12686 | 4308 | 4281 | 4322 |
|        | TIM-1 $\Delta$ MIL | 1651             | 1644  | 1781  | 2566 | 2470 | 2470 |
|        | TIM-1 $\Delta$ Cyt | 2778             | 2798  | 2703  | 4445 | 4513 | 4554 |
| 20 min | HEK293T            | 1392             | 1911  | 1535  | 1992 | 1945 | 1972 |
|        | TIM-1 WT           | 11162            | 27910 | 9311  | 4049 | 3823 | 3563 |
|        | TIM-1 $\Delta$ MIL | 1774             | 1549  | 1487  | 2286 | 2225 | 2013 |



|         |           |        |        |        |        |        |        |
|---------|-----------|--------|--------|--------|--------|--------|--------|
|         | TIM-1ΔCyt | 7010   | 8558   | 6230   | 2791   | 2675   | 2662   |
| 30 min  | HEK293T   | 935    | 3386   | 2887   | 1945   | 1958   | 1958   |
|         | TIM-1 WT  | 27861  | 20962  | 20810  | 9202   | 11238  | 11101  |
|         | TIM-1ΔMIL | 2614   | 2395   | 2245   | 2819   | 2880   | 2819   |
|         | TIM-1ΔCyt | 17862  | 15330  | 13956  | 3659   | 3550   | 3700   |
| 60 min  | HEK293T   | 6907   | 6401   | 6059   | 8092   | 9106   | 6545   |
|         | TIM-1 WT  | 125511 | 120343 | 104305 | 42200  | 49755  | 55290  |
|         | TIM-1ΔMIL | 9880   | 10778  | 10456  | 11780  | 11437  | 11574  |
|         | TIM-1ΔCyt | 60081  | 58162  | 57445  | 24495  | 26872  | 29266  |
| 120 min | HEK293T   | 23217  | 30118  | 23024  | 13626  | 10765  | 10909  |
|         | TIM-1 WT  | 417420 | 319246 | 309767 | 148887 | 142447 | 165227 |
|         | TIM-1ΔMIL | 26402  | 26305  | 25427  | 25144  | 28857  | 26236  |
|         | TIM-1ΔCyt | 240823 | 236166 | 255253 | 98093  | 89544  | 95671  |
| 240 min | HEK293T   | 22306  | 23155  | 23259  | 18585  | 16499  | 16651  |
|         | TIM-1 WT  | 644863 | 873281 | 639211 | 208850 | 181537 | 184888 |
|         | TIM-1ΔMIL | 56659  | 45967  | 52101  | 109151 | 177960 | 118980 |
|         | TIM-1ΔCyt | 414375 | 255245 | 264688 | 166552 | 97401  | 94489  |

**Table S2:** Raw data of the endosomal escape assay in relative light units (RLU). Parental HEK293T cells and cells expressing either TIM-1 WT or mutant variants were inoculated with nLuc-CHIKV and endosomal escape detected by luciferase assay.

**Movies:** Representative movies of mc-CHIKV diffusing at the surface of (A) TIM-1 WT and (B) mutant TIM-1ΔMIL. Both movies were recorded with an interval of 0.3 seconds between frames for 2 minutes. Videos were acquired 5 minutes after virus inoculum was added on cells (MOI=200). The trajectories of the landing viruses were reconstructed using TrackMate and are represented in yellow. Movies were processed in similar manner using Fiji: the time-lapse was smoothed followed by correction of uneven background with a rolling ball of 50 and the noise was despeckled twice. Finally, the LUT thresholds were set to be at a minimum of 150 and maximum of 500. The movies were saved with an acceleration of 50 frames per second.
